# Supplementary material
Source: Research Square preprint supplement (doi:10.21203/rs.3.rs-9363092/v1)
Supplement: Supplementary file 1 [file d7388382f511a9076b6f6b81.docx]

**APPENDICES**


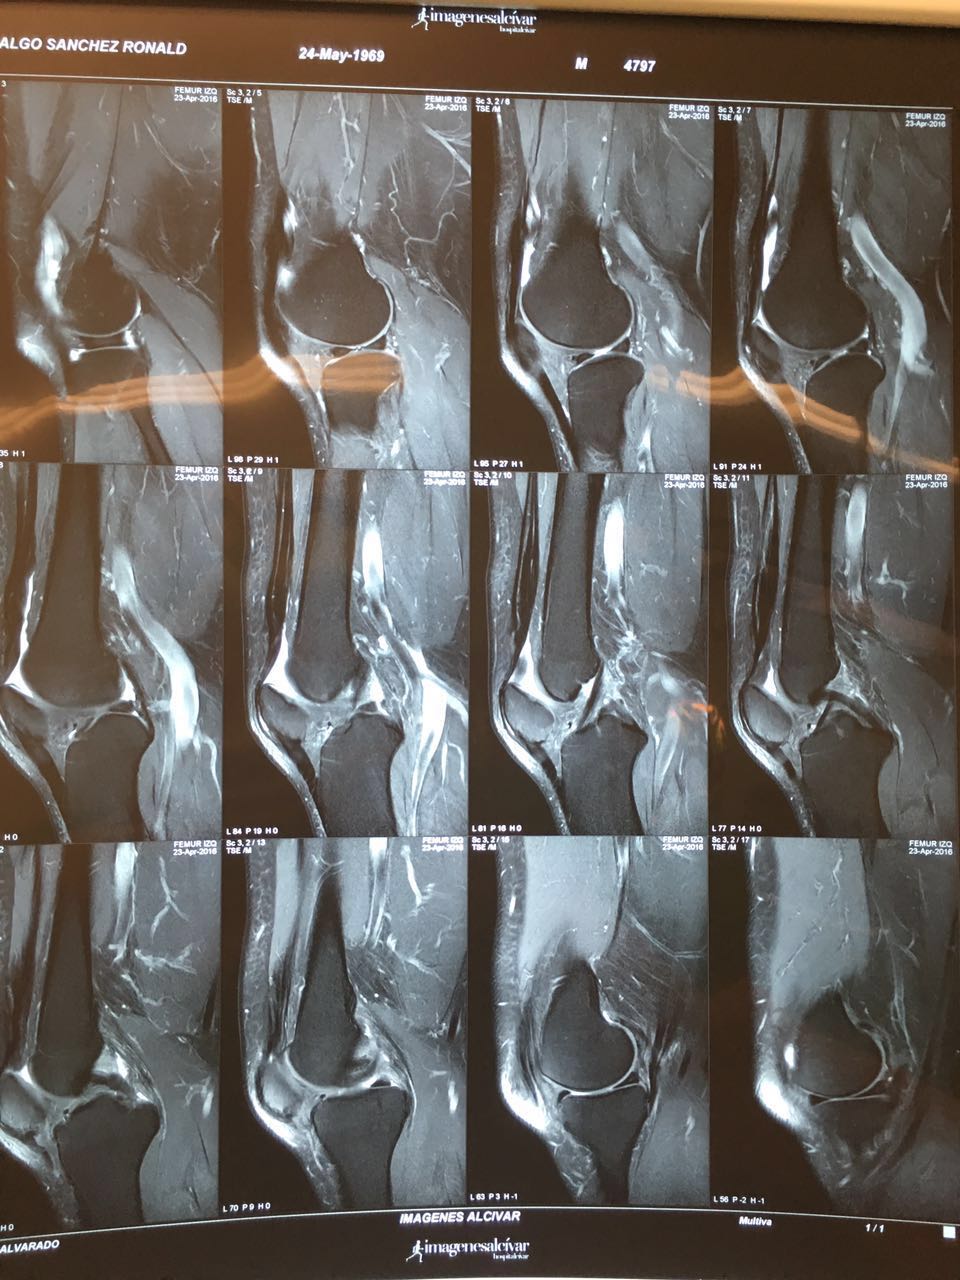


***Figure 1. Loss of patellar tendon tension. Patient No. 1.***


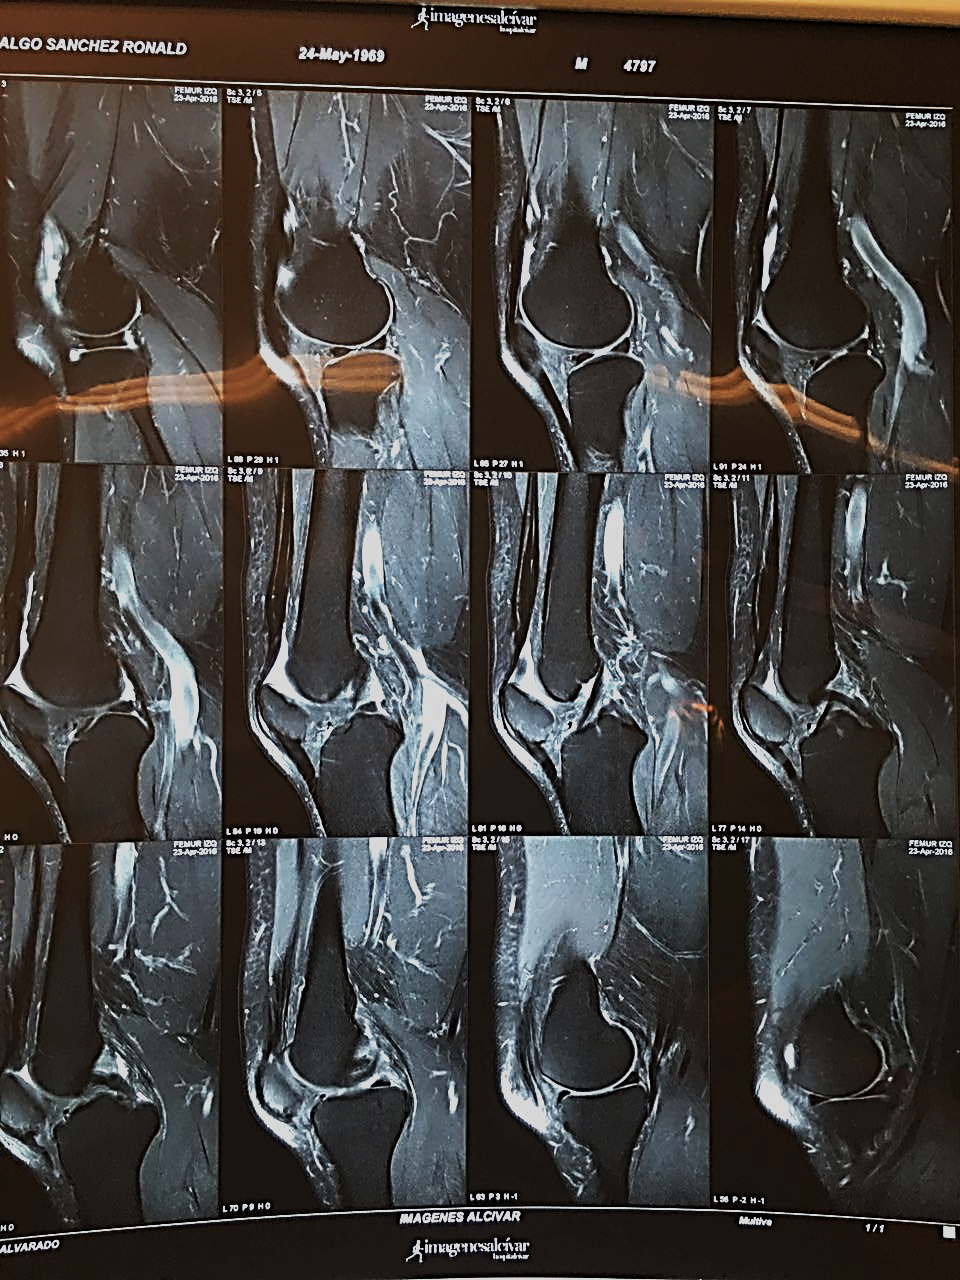

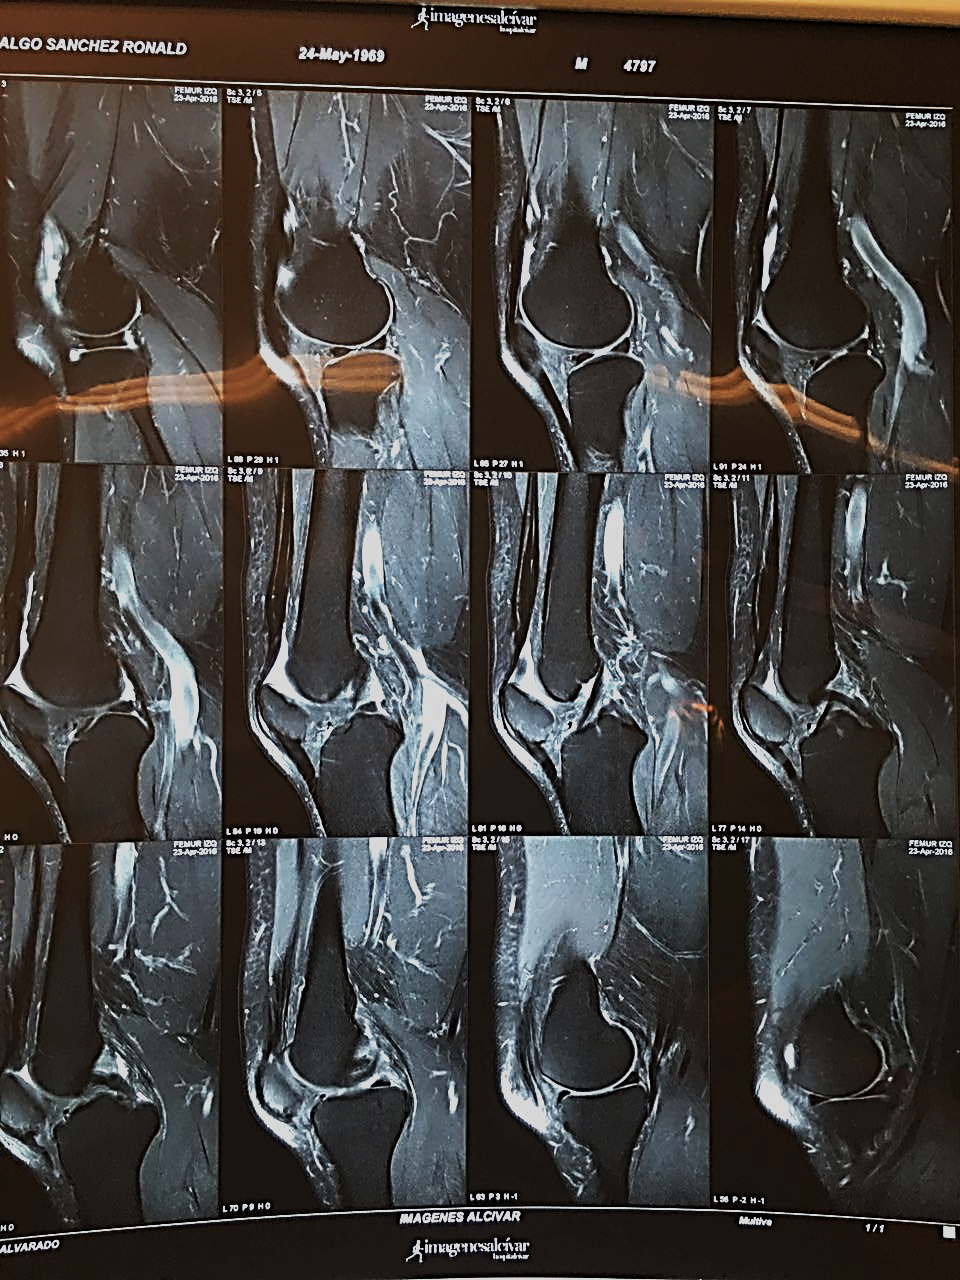


***Figure 2. Decreased patellar height. Patient No. 2.***

***APPENDICES – SURGICAL TECHNIQUE #1***

***
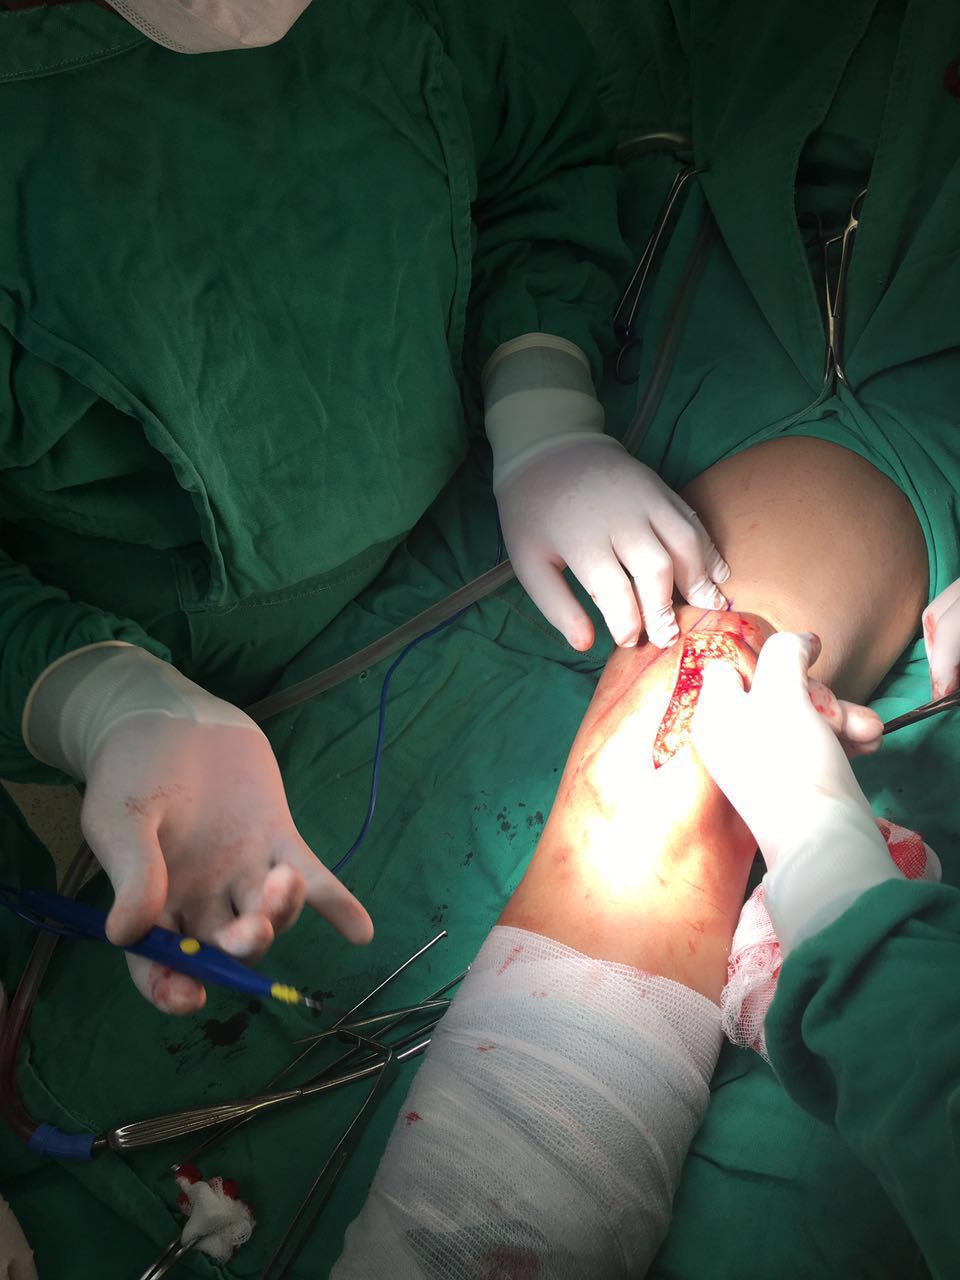
***

***Figure 3. Longitudinal incision with dissection of the subcutaneous cellular tissue.***

***
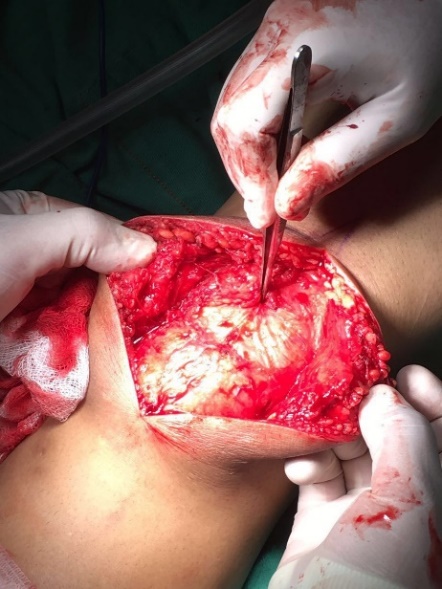
***

***Figure 4. Exposure of the extensor mechanism.***


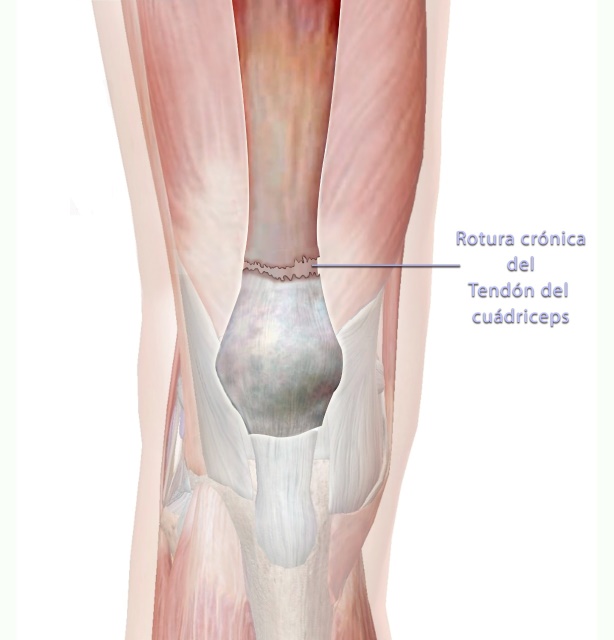


***Figure 5. Exposure of the extensor mechanism and the described pathology.***

**
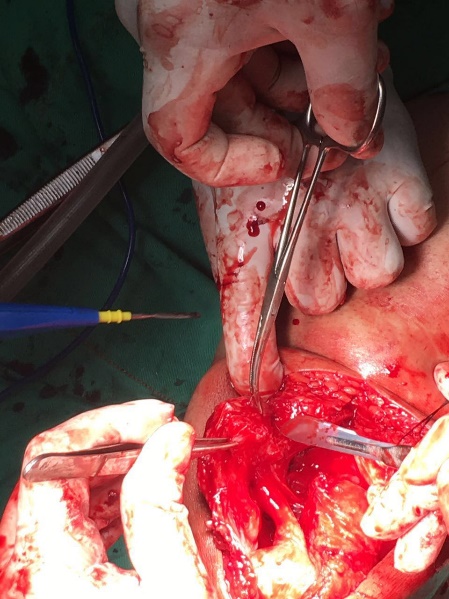
**

***Figure 6. Debridement of nonviable tissue.***


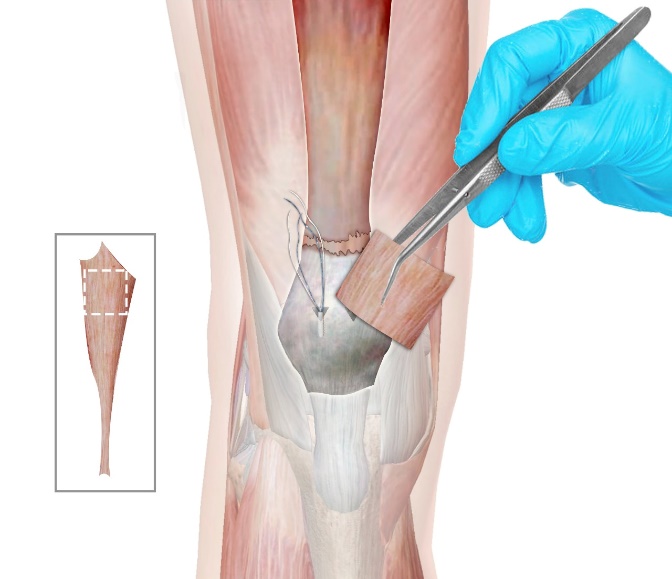


***Figure 7. Harvesting of the Achilles tendon allograft.***

***
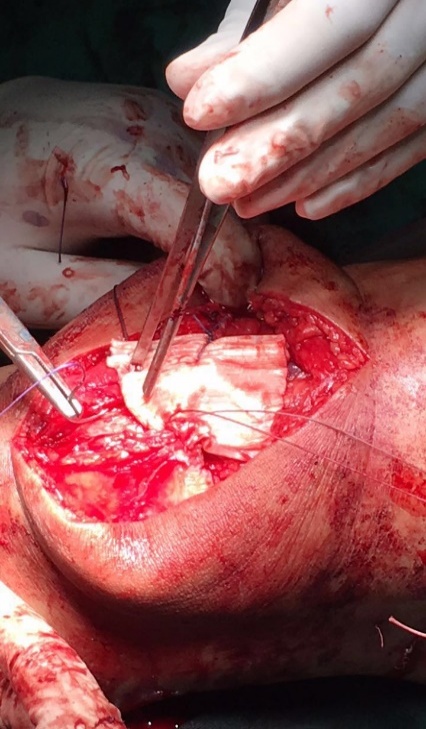
***

***Figure 8. Placement of the Achilles tendon allograft.***


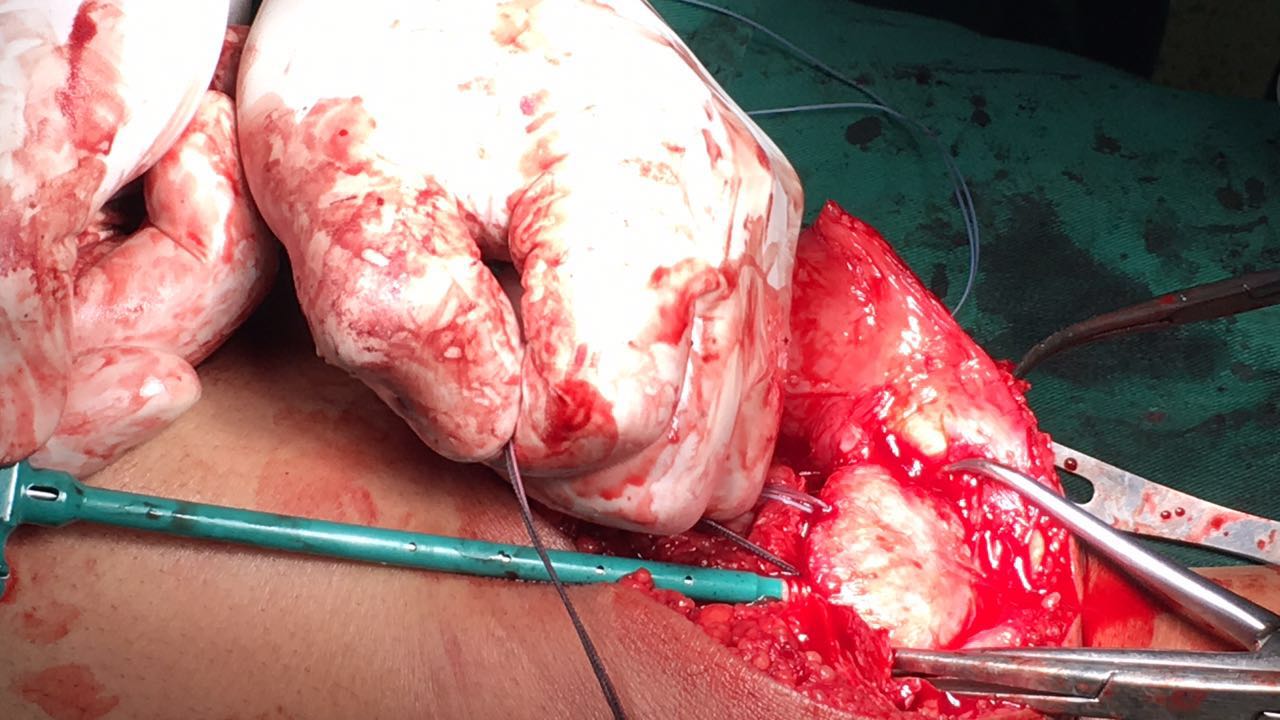


***Figure 9. Placement of medial and lateral PEEK anchors.***


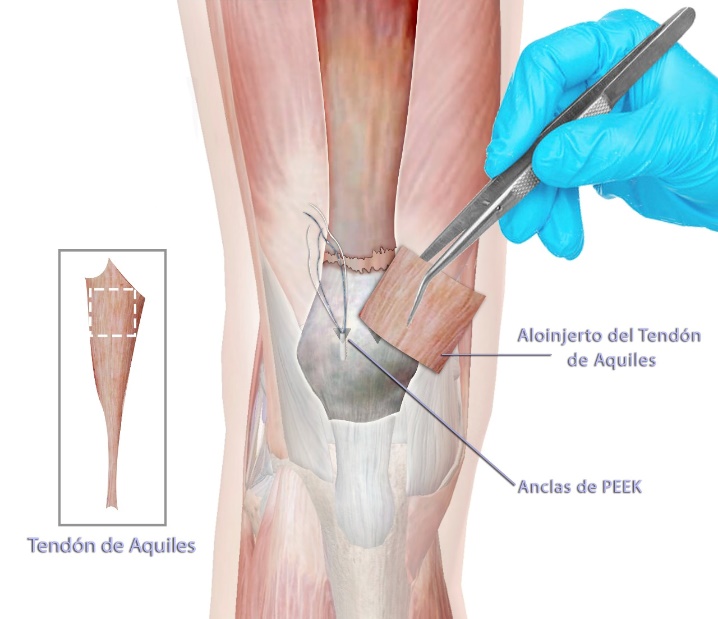


***Figure 10. Placement of the Achilles tendon allograft with PEEK anchors.***


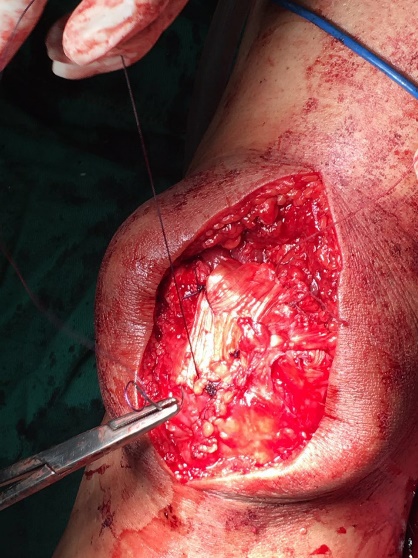


***Figure 11. Final suturing of the Achilles tendon allograft.***


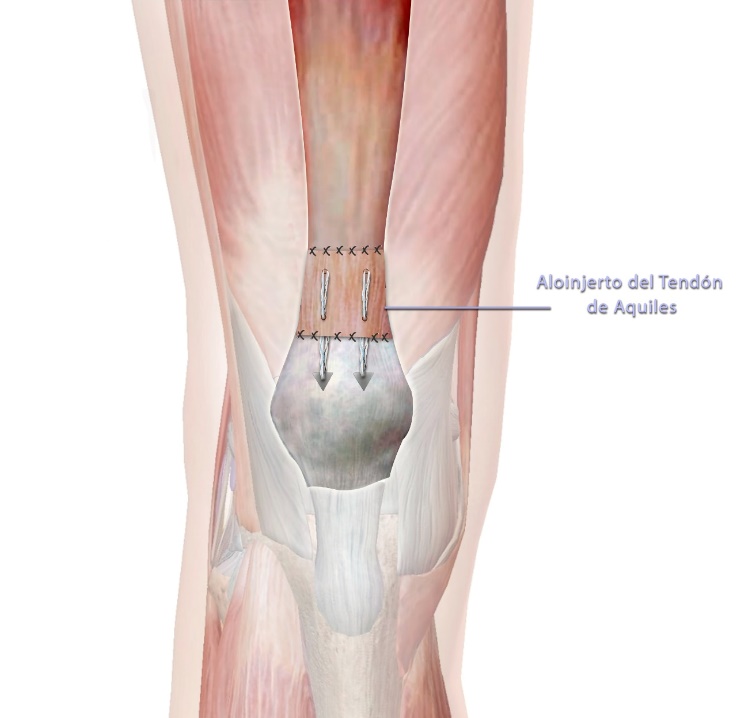


***Figure 12. Final suturing of the Achilles tendon allograft.***


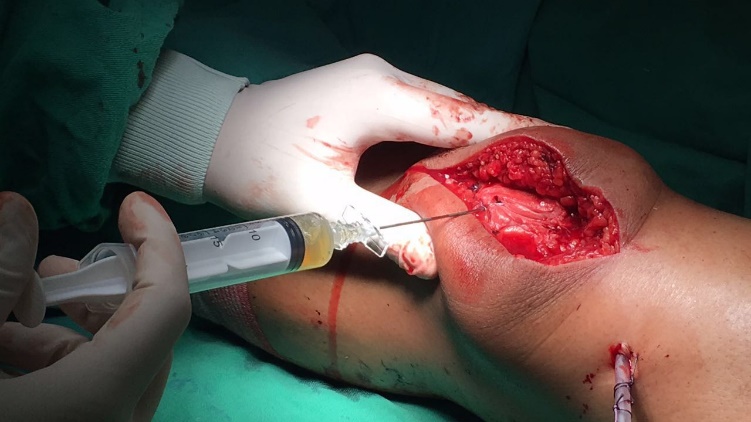


***Figure 13. Platelet-rich plasma infiltration.***


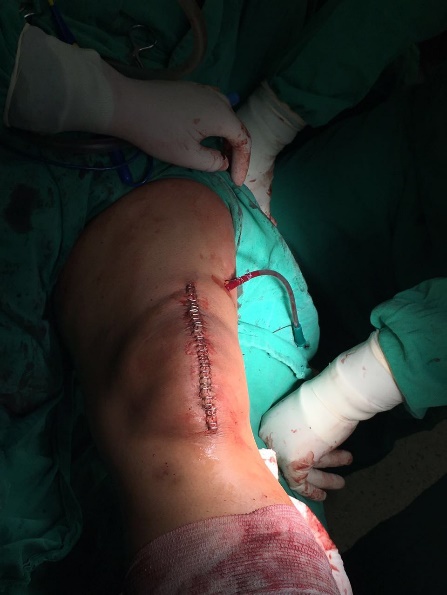


***Figure 14. Skin closure.***


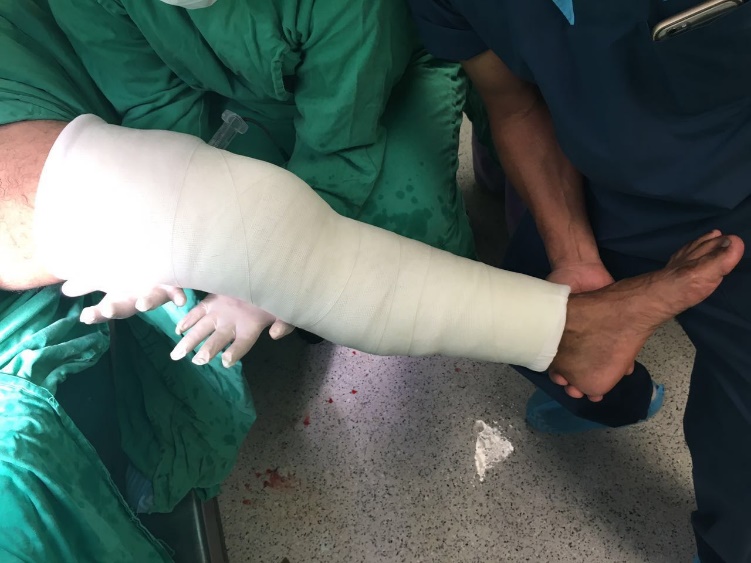


***Figure 15. Immobilization of the affected lower limb.***

***APPENDICES – SURGICAL TECHNIQUE #2***


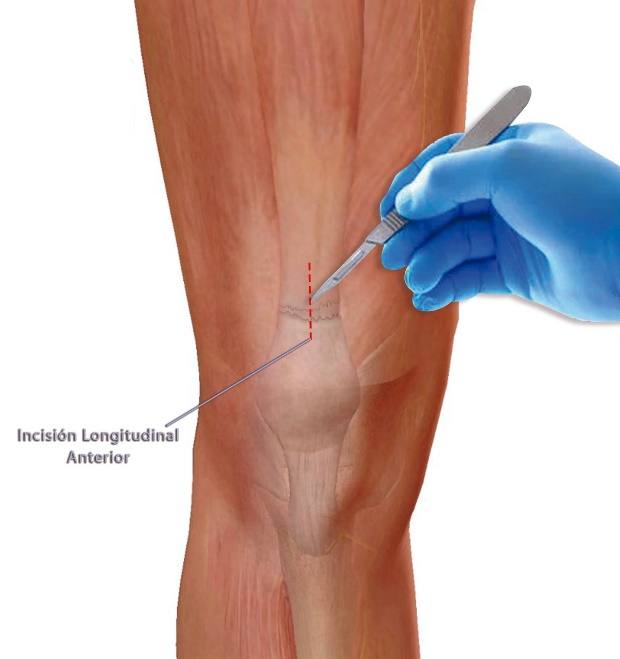


***Figure 16. Anterior knee incision.***


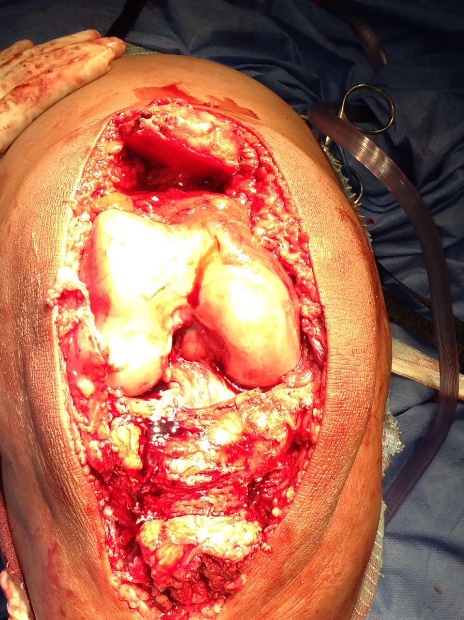


***Figure 17. Exposure of the pathologic extensor mechanism.***


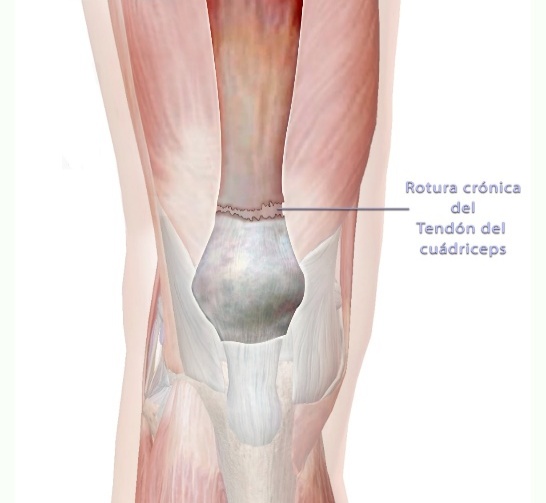


***Figure 18. Exposure of the pathologic extensor mechanism.***

***.***
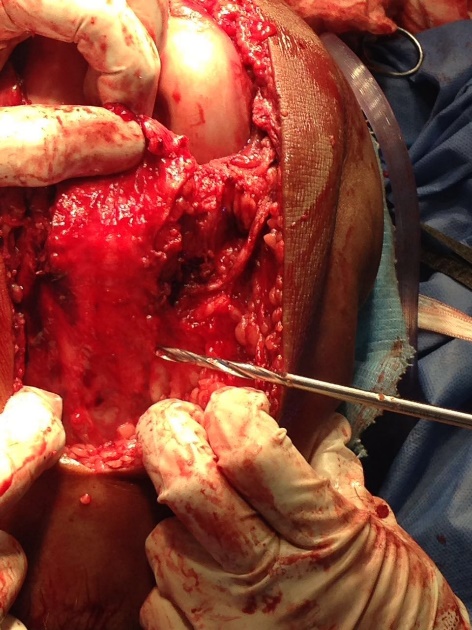


***Figure 19. Tunneling at the superior pole of the patella.***


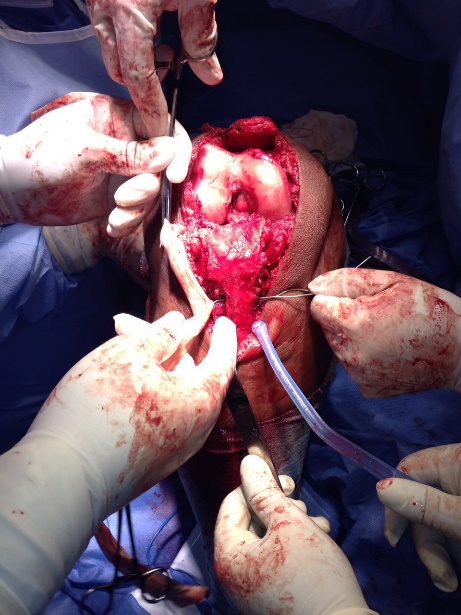


***Figure 20. Passage of the allograft through the patellar tunnel.***


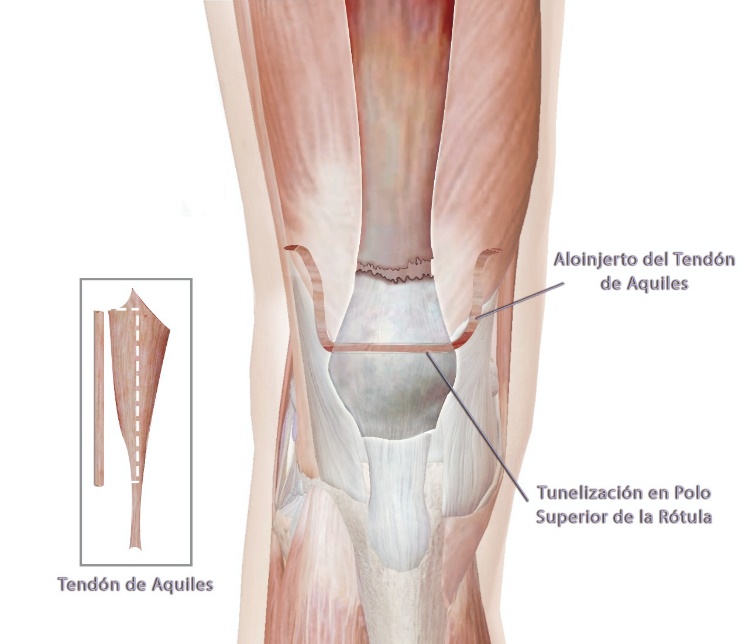


***Figure 21. Tunneling at the superior pole of the patella.***


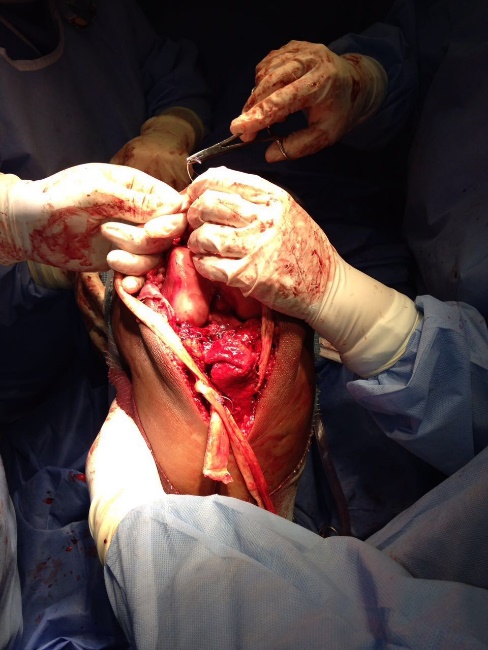


***Figure 22. Fixation of the Achilles tendon allograft to the quadriceps tendon tear using suture technique.***


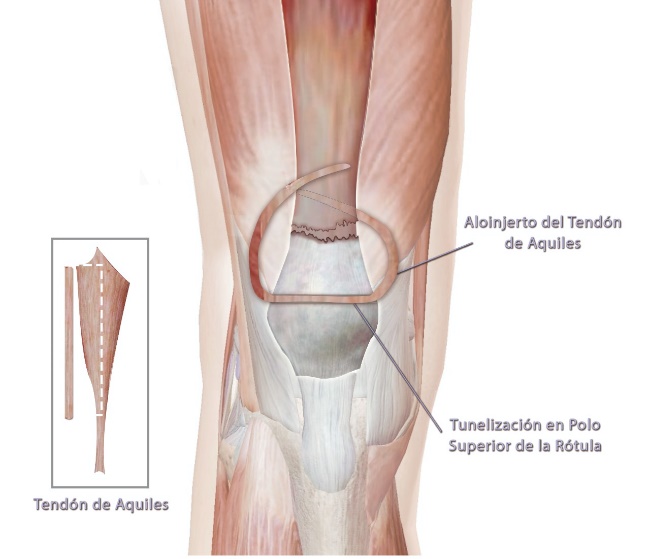


***Figure 23. Integration of the Achilles tendon allograft with the quadriceps tendon tear using sutures.***


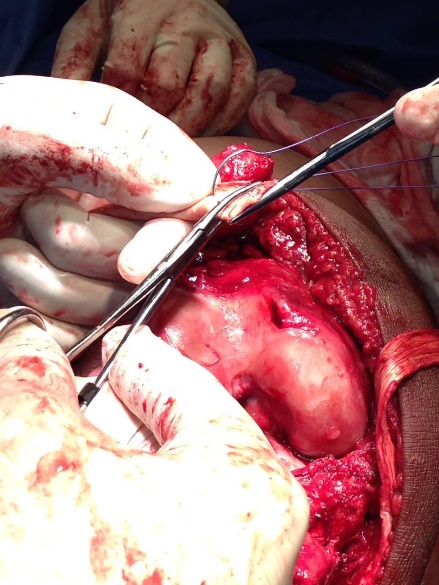


***Figure 24. Final construct of the extensor mechanism reconstruction.***


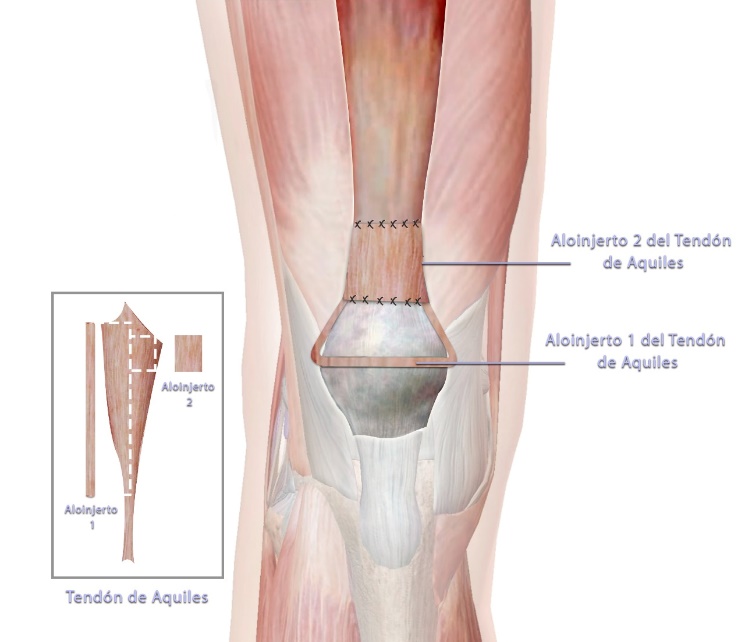


***Figure 25. Final construct of the extensor mechanism reconstruction***
